# Supplementary material
Source: MDPI journal article supplement (https://www.mdpi.com/2076-3417/13/8/4818)
Supplement: s1 [file s1]

**Table S1.** Total color difference  $\Delta E$  calculated for corn extrudates with addition of fruit pomace.

| Sample  | Control | ECHB-05 | ECHB-10 | ECHB-20 | ECH-05 | ECH-10 | ECH-20 | EBC-05 | EBC-10 | EBC-20 |
|---------|---------|---------|---------|---------|--------|--------|--------|--------|--------|--------|
| Control | -       |         |         |         |        |        |        |        |        |        |
| ECHB-05 | 26,9    | -       |         |         |        |        |        |        |        |        |
| ECHB-10 | 32,1    | 5,3     | -       |         |        |        |        |        |        |        |
| ECHB-20 | 49,9    | 23,5    | 18,2    | -       |        |        |        |        |        |        |
| ECH-05  | 13,0    | 14,0    | 19,2    | 37,1    | -      |        |        |        |        |        |
| ECH-10  | 18,7    | 8,3     | 13,5    | 31,4    | 5,8    | -      |        |        |        |        |
| ECH-20  | 28,9    | 4,1     | 4,4     | 21,0    | 16,1   | 10,4   | -      |        |        |        |
| EBC-05  | 20,0    | 7,5     | 12,6    | 30,8    | 7,4    | 3,9    | 10,7   | -      |        |        |
| EBC-10  | 27,5    | 1,8     | 5,0     | 23,1    | 14,6   | 9,2    | 4,8    | 7,7    | -      |        |
| EBC-20  | 35,4    | 8,7     | 3,5     | 15,0    | 22,6   | 16,9   | 7,4    | 15,9   | 8,2    | -      |

<sup>1</sup> Tables may have a footer.
